# Supplementary material for: Synthetic Lethality of the bfr and mbfA Genes Reveals a Functional Relationship between Iron Storage and Iron Export in Managing Stress Responses in Bradyrhizobium japonicum
Source: PubMed Central journal article supplement (PMC4902296; doi:10.1371/journal.pone.0157250), 2016-06-10
Supplement: pone.0157250.s001.pdf [file pone.0157250.s001.pdf]

## Supporting Information

Sankari, S and O'Brian, M.R.

Synthetic lethality of the *bfr* and *mbfA* genes reveals a functional relationship between iron storage and iron export in managing stress responses in *Bradyrhizobium japonicum*

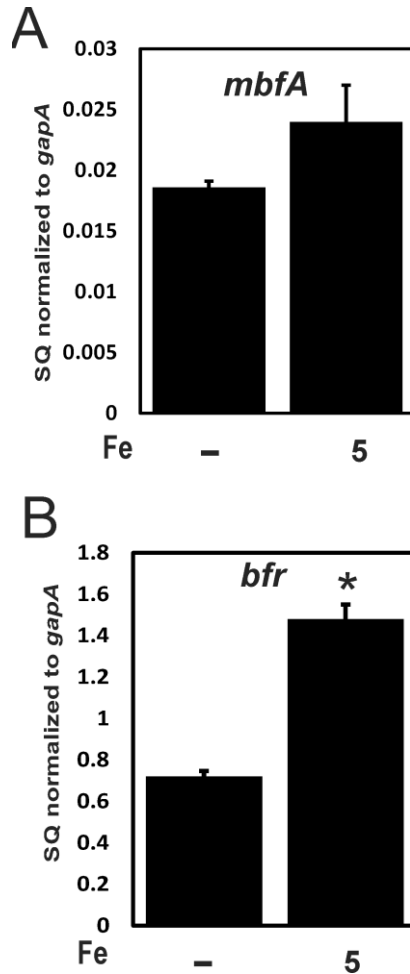

Figure S1. Steady state transcript levels of *mbfA* (A) or *bfr* (B) gene mRNA in wild type cells. Cells were grown in media containing no added iron (-) or 5  $\mu$ M FeSO<sub>4</sub>. RNA was analyzed by quantitative real-time PCR. The data are expressed as relative starting quantities (SQ) of respective mRNAs normalized to the house keeping gene *gapA*, and presented as average of three replicates  $\pm$ SD. An asterisk denotes a significant difference in the mRNA level in cells grown in 5  $\mu$ M iron compared to that grown in media without iron supplementation based on Student's *t* test using a confidence level of  $p < 0.01$ .
